# Supplementary material for: Mental health service use and its associated factors among nurses in China: a cross-sectional survey
Source: PeerJ journal article supplement (doi:10.7717/peerj.11181), 2021-04-05
Supplement: questionnaire-Chinese.docx [file questionnaire-Chinese.docx]

**医务人员职业健康现状调查**

感谢您点开此问卷，完成填写大约需要3分钟，此为匿名调查，所得数据全部用于科学研究，请选择“同意”继续填写或者“不同意”退出填写。请您如实填写，祝您生活愉快，工作顺利！

1. 性别： [单选题] *

| ○男 | ○女 |  |  |  |  |  |  |
| --- | --- | --- | --- | --- | --- | --- | --- |

2. 您的年龄： [填空题] *

|  |  |  |  |  |  |  |
| --- | --- | --- | --- | --- | --- | --- |

3. 目前婚姻状况 [单选题] *

| ○未婚 |
| --- |
| ○已婚 |

4. 所在医院类型 [单选题] *

| ○三级医院 |
| --- |
| ○二级医院 |
| ○社区医院 |
| ○个体诊所 |

5. 职称 [单选题] *

| ○高级职称 |
| --- |
| ○中级职称 |
| ○初级职称 |

6. 最高学历 [单选题] *

| ○大专及以下 |
| --- |
| ○本科 |
| ○硕士及以上 |
|  |

7. 您1星期平均多少小时**在医院工作**？
   [填空题] *

8. 是否需要倒班？
[单选题] *

| ○是 |
| --- |
| ○否 |

请回忆自己近一个月的睡眠状况，如实填写以下信息。

9. 最近1个月，晚上通常几点钟上床睡觉？ [填空题] *

_________________________________

10. 最近1个月，从上床到入睡通常需要多少分钟？ [填空题] *

_________________________________

11. 最近1个月，早上通常几点钟起床？ [填空题] *

_________________________________

12. 最近1个月，每夜通常实际睡眠时间几小时？（不等于卧床时间） [填空题] *

_________________________________

13. 近1个月，您有没有因为下列情况而影响睡眠[矩阵量表题] *

|  | 无 | 不足1次/周 | 1-2次/周 | 3次或以上/周 |
| --- | --- | --- | --- | --- |
| 入睡困难（30分钟内不能入睡） | ○ | ○ | ○ | ○ |
| 夜间易醒或早醒 | ○ | ○ | ○ | ○ |
| 夜间去厕所 | ○ | ○ | ○ | ○ |
| 呼吸不畅 | ○ | ○ | ○ | ○ |
| 大声咳嗽或鼾声高 | ○ | ○ | ○ | ○ |

14. 近1个月，您有没有因为下列情况而影响睡眠[矩阵量表题] *

|  | 无 | 不足1次/周 | 1-2次/周 | 3次或以上/周 |
| --- | --- | --- | --- | --- |
| 感觉冷 | ○ | ○ | ○ | ○ |
| 感觉热 | ○ | ○ | ○ | ○ |
| 做噩梦 | ○ | ○ | ○ | ○ |
| 疼痛不适 | ○ | ○ | ○ | ○ |
| 其他影响睡眠的事情 | ○ | ○ | ○ | ○ |

15. 最近1个月，总的来说，您认为自己的睡眠质量 [单选题] *

| ○很好 |
| --- |
| ○较好 |
| ○较差 |
| ○很差 |

16. 近1个月，您使用助眠药物的情况 [单选题] *

| ○无 |
| --- |
| ○不足一次/周 |
| ○1-2次/周 |
| ○3次或以上/周 |

17. 近1个月，您感到困倦吗？ [单选题] *

| ○无 |
| --- |
| ○不足一次/周 |
| ○1-2次/周 |
| ○3次或以上/周 |

18. 近1个月，您感到做事精力不足吗？ [单选题] *

| ○没有 |
| --- |
| ○偶尔有 |
| ○有时有 |
| ○经常有 |

19. 在过去两周，你被以下两种症状困扰的频率是？*

|  | 没有 | ≤7天 | ≥7天 | 几乎每天 |
| --- | --- | --- | --- | --- |
| 没有兴趣做任何事情 | ○ | ○ | ○ | ○ |
| 情绪低落，感觉抑郁或无望 | ○ | ○ | ○ | ○ |

请根据自己的感受和体会，判断以下选项在您身上发生的频率。

20. 标题[矩阵量表题] *

|  | 从不 | 1年几次或更少 | 1月1次或更少 | 1个月几次 | 每周一次 | 每周几次 | 每天 |
| --- | --- | --- | --- | --- | --- | --- | --- |
| 工作让我感觉身心疲惫 | ○ | ○ | ○ | ○ | ○ | ○ | ○ |
| 下班的时候我感到筋疲力竭 | ○ | ○ | ○ | ○ | ○ | ○ | ○ |
| 早晨起床不得不去面对一天的工作时，我感到非常累 | ○ | ○ | ○ | ○ | ○ | ○ | ○ |

21. 标题[矩阵量表题] *

|  | 从不 | 1年几次或更少 | 1月1次或更少 | 1个月几次 | 每周一次 | 每周几次 | 每天 |
| --- | --- | --- | --- | --- | --- | --- | --- |
| 整天工作对我来说确实压力很大 | ○ | ○ | ○ | ○ | ○ | ○ | ○ |
| 工作让我有快要崩溃的感觉 | ○ | ○ | ○ | ○ | ○ | ○ | ○ |
| 自从开始干这份工作，我对工作越来越不感兴趣 | ○ | ○ | ○ | ○ | ○ | ○ | ○ |

22. 标题[矩阵量表题] *

|  | 从不 | 1年几次或更少 | 1月1次或更少 | 1个月几次 | 每周一次 | 每周几次 | 每天 |
| --- | --- | --- | --- | --- | --- | --- | --- |
| 我对工作不像以前那样热心了 | ○ | ○ | ○ | ○ | ○ | ○ | ○ |
| 我怀疑自己所做工作的意义 | ○ | ○ | ○ | ○ | ○ | ○ | ○ |
| 我对自己所做的工作是否有贡献越来越不关心 | ○ | ○ | ○ | ○ | ○ | ○ | ○ |

23. 标题[矩阵量表题] *

|  | 从不 | 1年几次或更少 | 1月1次或更少 | 1个月几次 | 每周一次 | 每周几次 | 每天 |
| --- | --- | --- | --- | --- | --- | --- | --- |
| 我能有效地解决工作中出现的问题 | ○ | ○ | ○ | ○ | ○ | ○ | ○ |
| 我觉得我在为医院做有用的贡献 | ○ | ○ | ○ | ○ | ○ | ○ | ○ |
| 在我看来，我擅长自己的工作 | ○ | ○ | ○ | ○ | ○ | ○ | ○ |

24. 标题[矩阵量表题] *

|  | 从不 | 1年几次或更少 | 1月1次或更少 | 1个月几次 | 每周一次 | 每周几次 | 每天 |
| --- | --- | --- | --- | --- | --- | --- | --- |
| 当完成工作上的一些事情时，我感到非常高兴 | ○ | ○ | ○ | ○ | ○ | ○ | ○ |
| 我完成了很多有价值的工作 | ○ | ○ | ○ | ○ | ○ | ○ | ○ |
| 我自信自己能有效完成各项工作 | ○ | ○ | ○ | ○ | ○ | ○ | ○ |

25. 你是否因为压力、睡眠或其他情绪问题等看过精神科门诊、心理咨询等服务?*

| ○是 |
| --- |
| ○否 |
